# Supplementary material for: Fabrication and assessment of an electrospun polymeric microfiber-based platform under bulk flow conditions with rapid and efficient antigen capture
Source: Royal Society of Chemistry journal article supplement (doi:10.1039/c7an01366c), 2017-12-22
Supplement: c7an01366c1.pdf [file c7an01366c1.pdf]

## ASSOCIATED CONTENT

### Supporting Information

**Table S1. Processing and environmental conditions for the electrospinning of PS**

|                  |            |
|------------------|------------|
| Rotational Speed | 2 m/min    |
| Traverse Speed   | 0.5 cm/sec |
| Syringe Speed    | 20 mm/sec  |
| Working Distance | 17 cm      |
| Voltage          | 25 kV      |
| Processing Time  | 20 min     |
| Temperature      | 25°C       |
| Humidity         | 65%        |

**Table S2. ELISA Antibody / Antigen Reagents**

|                          |                                            |          |
|--------------------------|--------------------------------------------|----------|
| 1 <sup>st</sup> Antibody | Goat Anti-Human Albumin                    | 10 µg/mL |
| Antigen                  | Human Serum Albumin                        | 1 µg/mL  |
| 2 <sup>nd</sup> Antibody | Goat Anti-Human Albumin<br>FITC-Conjugated | 10 µg/mL |

**Table S3. ELISA Solution Reagents**

|                         |                                                |
|-------------------------|------------------------------------------------|
| Wash Solution           | Tw20 0.05 vol% to PBS                          |
| Blocking Solution       | 25 vol% BlockingONE to H <sub>2</sub> O        |
| Second Antibody Diluent | Tw20 0.05 vol% : Blocking ONE 1.00 vol% to PBS |

**Table S4. Total Reagent Consumption and Processing Time Summary**

| Step                               | Reagent Consumption              | Processing Time |                |
|------------------------------------|----------------------------------|-----------------|----------------|
|                                    |                                  | PS Flat         | ESPS Fiber Mat |
| <b>1st Antibody Immobilization</b> | 1000 ng / sample                 | 60 min          | 60 min         |
| <b>Blocking</b>                    | 200 µL / sample<br>(BlockingONE) | 60 min          | 60 min         |
| <b>Antigen Capture</b>             | 500 ng / sample                  | 60 min          | 5 sec          |
| <b>Measurement</b>                 | 1000 ng / sample                 | 120 min         | 120 min        |
